## Position Statements

*A position statement is an official ADA point of view or belief that contains clinical or research recommendations.*

Position statements are issued on scientific or medical issues related to diabetes. They are published in ADA journals and other scientific/medical publications. ADA position statements are typically based on a systematic review or other review of published literature. Position statements undergo a formal review process. They are updated annually or as needed. *Key ADA position statements:* These are select position statements that represent official ADA opinion on topics not adequately covered in the Standards of Care but that are necessary to provide additional information on quality diabetes management. These position statements also undergo a formal review process. In addition to those published in this supplement, listed below are recent position statements.

### **Diabetes Management at Camps for Children With Diabetes**

American Diabetes Association  
*Diabetes Care* 35 (Suppl. 1):S72–S75, 2012

### **Management of Hyperglycemia in Type 2 Diabetes: A Patient-Centered Approach. Position Statement of the American Diabetes Association (ADA) and the European Association for the Study of Diabetes (EASD)**

Silvio E. Inzucchi, Richard M. Bergenstal, John B. Buse, Michaela Diamant, Ele Ferrannini, Michael Nauck, Anne L. Peters, Apostolos Tsapas, Richard Wender, and David R. Matthews  
*Diabetes Care* 35:1364–1379, 2012

### **Guidelines and Recommendations for Laboratory Analysis in the Diagnosis and Management of Diabetes Mellitus**

David B. Sacks, Mark Arnold, George L. Bakris, David E. Bruns, Andrea Rita Horvath, M. Sue Kirkman, Ake

Lernmark, Boyd E. Metzger, and David M. Nathan  
*Diabetes Care* 34:e61–e99, 2011

### **Diabetes Care for Emerging Adults: Recommendations for Transition From Pediatric to Adult Diabetes Care Systems. A Position Statement of the American Diabetes Association, With Representation by the American College of Osteopathic Family Physicians, the American Academy of Pediatrics, the American Association of Clinical Endocrinologists, the American Osteopathic Association, the Centers for Disease Control and Prevention, Children with Diabetes, The Endocrine Society, the International Society for Pediatric and Adolescent Diabetes, Juvenile Diabetes Research Foundation International, the National Diabetes Education Program, and the Pediatric Endocrine Society (formerly Lawson Wilkins Pediatric Endocrine Society)**

Anne Peters, Lori Laffel, and the American Diabetes Association Transitions Working Group  
*Diabetes Care* 34:2477–2485, 2011

### **Aspirin for Primary Prevention of Cardiovascular Events in People With Diabetes: A Position Statement of the American Diabetes Association, a Scientific Statement of the American Heart Association, and an Expert Consensus Document of the American College of Cardiology Foundation**

Michael Pignone, Mark J. Alberts, John A. Colwell, Mary Cushman, Silvio E. Inzucchi, Debabrata Mukherjee, Robert S. Rosenson, Craig D. Williams, Peter W. Wilson, and M. Sue Kirkman  
*Diabetes Care* 33:1395–1402, 2010

### **Exercise and Type 2 Diabetes. The American College of Sports Medicine and the American Diabetes Association: Joint Position Statement**

Sheri R. Colberg, Ronald J. Sigal, Bo Fernhall, Judith G. Regensteiner,

Bryan J. Blissmer, Richard R. Rubin, Lisa Chasan-Taber, Ann L. Albright, and Barry Braun  
*Diabetes Care* 33:e147–e167, 2010

### **Clinical Care Guidelines for Cystic Fibrosis–Related Diabetes: A Position Statement of the American Diabetes Association and a Clinical Practice Guideline of the Cystic Fibrosis Foundation, Endorsed by the Pediatric Endocrine Society**

Antoinette Moran, Carol Brunzell, Richard C. Cohen, Marcia Katz, Bruce C. Marshall, Gary Onady, Karen A. Robinson, Kathryn A. Sabadosa, Arlene Stecenko, Bonnie Slovis, and the CFRD Guidelines Committee  
*Diabetes Care* 33:2697–2708, 2010

### **Intensive Glycemic Control and the Prevention of Cardiovascular Events: Implications of the ACCORD, ADVANCE, and VA Diabetes Trials. A Position Statement of the American Diabetes Association and a Scientific Statement of the American College of Cardiology Foundation and the American Heart Association**

Jay S. Skyler, Richard Bergenstal, Robert O. Bonow, John Buse, Prakash Deedwania, Edwin A.M. Gale, Barbara V. Howard, M. Sue Kirkman, Mikhail Kosiborod, Peter Reaven, and Robert S. Sherwin  
*Diabetes Care* 32:187–192, 2009

### **Nutrition Recommendations and Interventions for Diabetes: A Position Statement of the American Diabetes Association**

American Diabetes Association  
*Diabetes Care* 31 (Suppl. 1):S61–S78, 2008
